# Supplementary figures and images for: Short-term Safety of Augmentation Mammaplasty Using the BellaGel Implants in Korean Women
Source: PubMed Central journal article supplement — Plast Reconstr Surg Glob Open. 2019 Dec 24;7(12):e2566. doi: 10.1097/GOX.0000000000002566 (PMC7288882; doi:10.1097/gox.0000000000002566), 2019-12-24

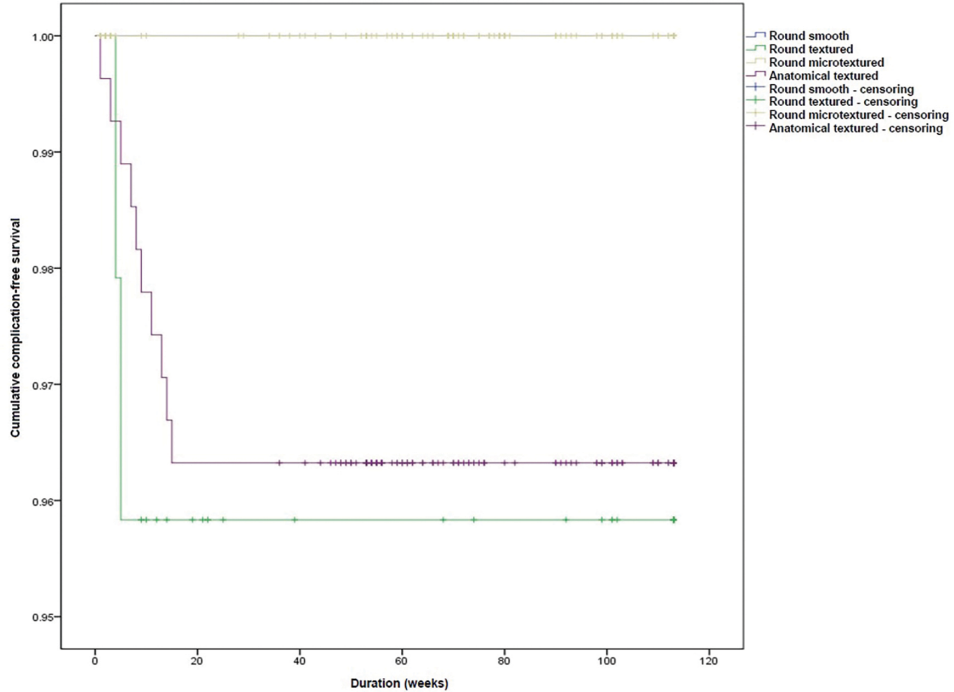

Supplement: gox-7-e2566-s001.pdf [file gox-7-e2566-s001.pdf]
